# Supplementary material for: PARP1 expression drives the synergistic antitumor activity of trabectedin and PARP1 inhibitors in sarcoma preclinical models
Source: Springer Nature journal article supplement (doi:10.1186/s12943-017-0652-5), 2017-04-28
Supplement: MOESM3 [file 12255634]

**group 1: 2220 probes deleted in HS cells/ unvariated or amplified in LS cells**

**chr. location**

chr 6 q22.1-31

chr 8 p23.1

chr10 q11.21

chr14 q21.1

chr16 q24.3

chr18 q23 q21.2 q21.31 q21.33 q22.1

| Term                                          | %      | PValue  | Genes                                                                                                   | Pop Hits | Fold Enrichment |
|-----------------------------------------------|--------|---------|---------------------------------------------------------------------------------------------------------|----------|-----------------|
| GO:0006643~membrane lipid metabolic process   | 2,0101 | 0,05508 | ST8SIA6, SMPDL3A, CREM, SERINC1                                                                         | 81       | 4,616466356     |
| GO:0006893~Golgi to plasma membrane transport | 1,005  | 0,07207 | GOPC, OPTN                                                                                              | 7        | 26,70955535     |
| GO:0030212~hyaluronan metabolic process       | 1,005  | 0,0917  | ITIH5, ITIH2                                                                                            | 9        | 20,7740986      |
| GO:0006629~lipid metabolic process            | 7,0352 | 0,09205 | CUBN, OLAH, CREM, PDSS1, PHYH, AKR1C3, AKR1C2, AKR1C4, ST8SIA6, SMPDL3A, SERINC1, PIP4K2A, IDI1, AKR1C1 | 813      | 1,609800999     |
| GO:0030183~B cell differentiation             | 1,5075 | 0,0922  | DCLRE1C, KLF6, ITGB1                                                                                    | 48       | 5,842715232     |
| GO:0051329~interphase of mitotic cell cycle   | 2,0101 | 0,09683 | CUL2, CDC123, ITGB1, NFATC1                                                                             | 103      | 3,630424998     |

**group 2:** 29 probes unvariated or amplified in HS cells/ deleted in LS cells

**chr. location**

Chr11q25 ( unknown associated genes)

**group 3:** 3200 probes deleted in Hs cells/ unvariated in LS cells

**chr. location**

chr3 p14.2

chr4 q13.2 q35.2

chr 6 p25.3 p22.3 chr6 p22.2 p22.1 p21.33 p21.32 p21.31 p21.2 p21.1

chr 7 q21.11 q21.12 q31.1

chr 10 p15.3 p15.2 p15.1 p14 p13 p12.33 p12.32 p12.31 p12.2 p12.1 p11.23 p11.22 p11.21 p11.1

chr 18 q23

chr11 p15.5

chr 12 q21.2 q24.33

chr 13 q11 q12.11 q12.12 q12.13 q12.2 q12.3

chr 14 q31.1

chr 18 q21.32 q23

chr 19 q11 q12 q13.11

chr 22 q12.2

| Term                                                                                            | %      | PValue  | Genes                                                       | Pop Hits | Fold Enrichment |
|-------------------------------------------------------------------------------------------------|--------|---------|-------------------------------------------------------------|----------|-----------------|
| GO:0048661~positive regulation of smooth muscle cell proliferation                              | 0,1273 | 0,00561 | FLT1, VEGFA, NOTCH4, FKBPL, AGPAT1                          | 31       | 6,878471884     |
| GO:0051260~protein homooligomerization                                                          | 0,2036 | 0,00683 | SCUBE3, ALDH5A1, ALOX5AP, LNX2, PFKP, ACOT13, ITPR3, AKR1C1 | 95       | 3,591286373     |
| GO:0002062~chondrocyte differentiation                                                          | 0,1018 | 0,00796 | FGF9, MAPK14, COL11A2, RUNX2                                | 18       | 9,477005707     |
| GO:0000082~G1/S transition of mitotic cell cycle                                                | 0,1527 | 0,00977 | CCNE1, CUL2, POLE, PIM1, ITGB1, LATS2                       | 56       | 4,569270609     |
| GO:0030949~positive regulation of vascular endothelial growth factor receptor signaling pathway | 0,0764 | 0,01059 | FLT1, FGF9, VEGFA                                           | 7        | 18,27708243     |
| GO:0001569~patterning of blood vessels                                                          | 0,1018 | 0,01232 | FLT1, NRP1, VEGFA, NOTCH4                                   | 21       | 8,123147749     |

|                              |        |         |                                                                                                                                                                                                                                                                                                                                                                                                                                                                                                                                                                                                                                                                                                                                                                                                                                                                                                                                                                                                                                                                                                                                                                                                                                                                                                                                                                                                                                                                                                                    |      |             |
|------------------------------|--------|---------|--------------------------------------------------------------------------------------------------------------------------------------------------------------------------------------------------------------------------------------------------------------------------------------------------------------------------------------------------------------------------------------------------------------------------------------------------------------------------------------------------------------------------------------------------------------------------------------------------------------------------------------------------------------------------------------------------------------------------------------------------------------------------------------------------------------------------------------------------------------------------------------------------------------------------------------------------------------------------------------------------------------------------------------------------------------------------------------------------------------------------------------------------------------------------------------------------------------------------------------------------------------------------------------------------------------------------------------------------------------------------------------------------------------------------------------------------------------------------------------------------------------------|------|-------------|
| GO:0008152~metabolic process | 5,0904 | 0,01342 | <p>FHIT, CDX2, PGC, HSD17B7P2, MED20, CUL2, EPC1, BRPF3, CUL7, CUL9, MAP3K8, ZNF248, LSM2, ZNF391, B3GALTL, OSBP2, PAN3, C4A, POLH, RPP21, C4B, ZNF507, POLE, MTPAP, PIM1, UBR2, SFRS3, DCLRE1C, RPS18, VEGFA, TMPRSS11F, YME1L1, PFKFB3, OLAH, ZNF76, ASB13, ATP12A, PDSS1, RPL21P28, GAD2, TAKR, MDFI, KLF6, AKR1E2, CFB, YTHDC1, RNF8, RNF6, TPTE2, NOTCH4, FTSJD2, TCF19, PARP4, IDI1, ABCF1, GTF3A, PPARD, SEPHS1, GPLD1, ZEB1, N6AMT2, LATS2, PTER, DIP2C, GPX6, GPX5, USP12, FANCE, MASTL, DHTKD1, C19ORF40, IP6K3, AGPAT1, ZNF33A, PRTFDC1, PEPD, POLR1D, SRPK1, LYZL1, GRM4, C19ORF2, ZSCAN16, AARS2, PRHOXNB, ZMYND11, ETV7, ZBTB9, CREM, ABI1, KIN, MDC1, ALOX5AP, PITRM1, DHX16, MTMR6, UPF2, LRRN3, TRIM27, ZNF25, PPP1R10, MAPK10, PRPF18, PHYH, MSRB2, ZNF165, PSMD13, MAPK14, RPL21, USP49, RBM17, STK38, SLC7A9, MIPEP, MCM10, TAPBP, ZNF187, GATA3, DNAJC1, GUSBL1, MYO3A, NUDT3, NUDT5, CMAH, PNPLA1, TRERF1, ZNF192, ZNF193, MRPS18A, FBXO18, ZNF438, BAT1, PPIL1, PTK7, MRPS10, TFEB, ATHL1, ZNF323, TTBK1, PTPLA, GLO1, STK19, RUNX2, ZMYM2, TAF3, CUBN, TAF8, SACS, TEAD3, FOXP4, PSMB8, SUV39H2, NMT2, ZNF311, ST8SIA6, ZNF318, ADAM22, PIP4K2A, BMI1, HSP90AB1, USPL1, ECHDC3, ZKSCAN3, AKR1C3, AKR1C2, IMMMP2L, CRYL1, AKR1CL1, AKR1C4, POU5F1, ITIH5, ITIH2, LTB, AKR1C1, ALDH5A1, PFKP, CDK8, CDC5L, HMGA1, PRKCCQ, CAPN11, CHST8, IFT88, TTRAP, CAMK1D, SUPT3H, FKBP5, NFYA, TRDMT1, FKBP, CEBPA, TNXB, FLT1, ADARB2, FLT3, CEBPG, SIRT3, SLC17A3, SLC17A4, ATP8A2, PSPC1, SCAND3</p> | 7647 | 1,115379251 |
|------------------------------|--------|---------|--------------------------------------------------------------------------------------------------------------------------------------------------------------------------------------------------------------------------------------------------------------------------------------------------------------------------------------------------------------------------------------------------------------------------------------------------------------------------------------------------------------------------------------------------------------------------------------------------------------------------------------------------------------------------------------------------------------------------------------------------------------------------------------------------------------------------------------------------------------------------------------------------------------------------------------------------------------------------------------------------------------------------------------------------------------------------------------------------------------------------------------------------------------------------------------------------------------------------------------------------------------------------------------------------------------------------------------------------------------------------------------------------------------------------------------------------------------------------------------------------------------------|------|-------------|

|                                                                                        |        |         |                                                                                                                                                                                                                                                                                                                                                                                                                                                                                                                                                                                                                                                                                                                                                                                                                                                                                                                                                                                                                                                                                                                                                                                                                                                                                                                                                                       |     |             |
|----------------------------------------------------------------------------------------|--------|---------|-----------------------------------------------------------------------------------------------------------------------------------------------------------------------------------------------------------------------------------------------------------------------------------------------------------------------------------------------------------------------------------------------------------------------------------------------------------------------------------------------------------------------------------------------------------------------------------------------------------------------------------------------------------------------------------------------------------------------------------------------------------------------------------------------------------------------------------------------------------------------------------------------------------------------------------------------------------------------------------------------------------------------------------------------------------------------------------------------------------------------------------------------------------------------------------------------------------------------------------------------------------------------------------------------------------------------------------------------------------------------|-----|-------------|
| GO:0016071~mRNA metabolic process                                                      | 0,4327 | 0,0138  | UPF2, PAN3, ADARB2, PPIL1, CEBPG, MTPAP, YTHDC1, CDC5L, PRPF18, KIN, SFRS3, SRPK1, VEGFA, DHX16, LSM2, RBM17, BAT1                                                                                                                                                                                                                                                                                                                                                                                                                                                                                                                                                                                                                                                                                                                                                                                                                                                                                                                                                                                                                                                                                                                                                                                                                                                    | 370 | 1,959434964 |
| GO:0030947~regulation of vascular endothelial growth factor receptor signaling pathway | 0,1018 | 0,01232 | FLT1, FGF9, VEGFA                                                                                                                                                                                                                                                                                                                                                                                                                                                                                                                                                                                                                                                                                                                                                                                                                                                                                                                                                                                                                                                                                                                                                                                                                                                                                                                                                     | 9   | 14,21550856 |
| GO:0008152~metabolic process                                                           | 5,0904 | 0,01342 | FHIT, CDX2, STK38, PGC, SLC7A9, MIPEP, MCM10, MED20, EPC1, CUL2, CUL7, BRPF3, ZNF187, CUL9, GATA3, ZNF248, MAP3K8, LSM2, DNAJC1, ZNF391, B3GALT1, GUSBL1, OSBP2, PAN3, C4A, MYO3A, RPP21, POLH, NUDT3, C4B, ZNF507, POLE, NUDT5, MTPAP, PIM1, UBR2, PNPLA1, TRERF1, SFRS3, DCLRE1C, ZNF192, ZNF193, RPS18, MRPS18A, FBXO18, TMPRSS11F, VEGFA, YME1L1, ZNF438, BAT1, PFKFB3, PPIL1, OLAH, ZNF76, PTK7, MRPS10, TFEB, ATHL1, ASB13, ATP12A, PDSS1, RPL21P28, ZNF323, GAD2, TTBK1, PTPLA, GLO1, STK19, RUNX2, MDFI, KLF6, ZMYM2, TAF3, CUBN, CFB, TAF8, SACS, YTHDC1, TEAD3, FOXP4, PSMB8, SUV39H2, NMT2, RNF8, RNF6, ZNF311, ST8SIA6, NOTCH4, TCF19, ZNF318, PARP4, ADAM22, IDI1, PIP4K2A, HSP90AB1, ABCF1, BMI1, GTF3A, PPARD, USPL1, SEPHS1, GPLD1, ZEB1, ZKSCAN3, LATS2, AKR1C3, AKR1C2, IMMP2L, CRYL1, AKR1C4, GPX5, POU5F1, USP12, FANCE, ITIH5, ITIH2, MASTL, DHTKD1, C19ORF40, IP6K3, AKR1C1, AGPAT1, ZNF33A, PRTFDC1, PEPD, POLR1D, ALDH5A1, PFKP, CDK8, CDC5L, HMGA1, SRPK1, PRKCQ, GRM4, CAPN11, CHST8, C19ORF2, ZSCAN16, AARS2, IFT88, PRHOXNB, CAMK1D, TTRAP, SUPT3H, ZMYND11, ETV7, FKBP5, CREM, ZBTB9, ABI1, NFYA, KIN, MDC1, TRDMT1, ALOX5AP, PITRM1, DHX16, MTMR6, FKBPL, CEBPA, UPF2, FLT1, ADARB2, FLT3, CEBPG, LRRN3, TRIM27, PPP1R10, ZNF25, MAPK10, PRPF18, PHYH, MSRB2, ZNF165, SIRT3, PSMD13, MAPK14, RPL21, ATP8A2, PSPC1, USP49, SCAND3, RBM17 | 7   | 18,27708243 |

|                                                           |        |         |                                                                                                                                                                                                                                                                                                         |      |             |
|-----------------------------------------------------------|--------|---------|---------------------------------------------------------------------------------------------------------------------------------------------------------------------------------------------------------------------------------------------------------------------------------------------------------|------|-------------|
| GO:0044238~primary metabolic process                      | 4,6322 | 0,01879 | ADCY2, UTP18, SLC6A3, ADAMTS16, CTNND2, PRKDC, UBE2V2, UBE2QL1, PRDM16, LPCAT1, RB1CC1, MOS, SDR16C5, SRD5A1, TCEA1, RPS20, TGS1, NSMAF, NSUN2, TERT, TRIP13, PLAG1, LYN, DFFB, PAPD7, ATP6V1H, LYPLA1, LRRC47, SNAI2, MARCH6, MCM4, TP73, PXDNL, MTRR, SPAG9, TMEM68, CCT5, TOM1L1, NME1, PCMTD1, ST18 | 6923 | 1,121142232 |
| GO:0051259~protein oligomerization                        | 0,2545 | 0,02125 | SCUBE3, ALDH5A1, ALOX5AP, LNX2, PFKP, TRIM27, ACOT13, ITPR3, PDSS1, AKR1C1                                                                                                                                                                                                                              | 174  | 2,450949752 |
| GO:0048660~regulation of smooth muscle cell proliferation | 0,1273 | 0,02215 | FLT1, VEGFA, NOTCH4, FKBPL, AGPAT1                                                                                                                                                                                                                                                                      | 46   | 4,635491922 |
| GO:0006986~response to unfolded protein                   | 0,1527 | 0,02513 | BAT5, HSP90AB1, HSPH1, CFB, CSNK2B, CLIC1                                                                                                                                                                                                                                                               | 71   | 3,603931748 |

|                                             |        |         |                                                                                                                                                                                                                                                                                                                                                                                                                                                                                                                                                                                                                                                                                                                                                                                                                                                                                                                                                                                                                                                                                                                                  |      |             |
|---------------------------------------------|--------|---------|----------------------------------------------------------------------------------------------------------------------------------------------------------------------------------------------------------------------------------------------------------------------------------------------------------------------------------------------------------------------------------------------------------------------------------------------------------------------------------------------------------------------------------------------------------------------------------------------------------------------------------------------------------------------------------------------------------------------------------------------------------------------------------------------------------------------------------------------------------------------------------------------------------------------------------------------------------------------------------------------------------------------------------------------------------------------------------------------------------------------------------|------|-------------|
| GO:0043170~macromolecule metabolic process  | 3,8687 | 0,02724 | FHIT, CDX2, STK38, PGC, MIPEP, MCM10, MED20, EPC1, CUL2, CUL7, BRPF3, ZNF187, CUL9, GATA3, ZNF248, MAP3K8, LSM2, ZNF391, DNAJC1, PAN3, RPP21, POLH, MYO3A, C4A, C4B, ZNF507, POLE, MTPAP, PIM1, UBR2, TRERF1, SFRS3, DCLRE1C, ZNF192, ZNF193, RPS18, MRPS18A, FBXO18, TMPRSS11F, VEGFA, YME1L1, ZNF438, BAT1, ZNF76, PPIL1, PTK7, MRPS10, TFEB, ASB13, RPL21P28, ZNF323, TTBK1, PTPLA, STK19, RUNX2, MDFI, KLF6, ZMYM2, TAF3, CFB, TAF8, SACS, YTHDC1, TEAD3, FOXP4, PSMB8, SUV39H2, NMT2, RNF8, RNF6, ZNF311, ST8SIA6, NOTCH4, TCF19, ZNF318, PARP4, ADAM22, HSP90AB1, ABCF1, BMI1, GTF3A, PPARD, USPL1, SEPHS1, ZEB1, ZKSCAN3, LATS2, IMMP2L, POU5F1, USP12, FANCE, ITIH5, ITIH2, MASTL, LTB, C19ORF40, IP6K3, ZNF33A, PEPD, POLR1D, CDK8, CDC5L, HMGA1, SRPK1, LYZL1, PRKCQ, GRM4, CAPN11, CHST8, C19ORF2, ZSCAN16, IFT88, AARS2, CAMK1D, TTRAP, SUPT3H, ZMYND11, ETV7, FKBP5, CREM, ZBTB9, ABI1, NFYA, KIN, MDC1, TRDMT1, PITRM1, DHX16, MTMR6, FKBPL, CEBPA, UPF2, TNXB, FLT1, ADARB2, FLT3, CEBPG, LRRN3, TRIM27, PPP1R10, ZNF25, MAPK10, PRPF18, MSRB2, ZNF165, SIRT3, PSMD13, MAPK14, RPL21, PSPC1, USP49, SCAND3, RBM17 | 5710 | 1,13524902  |
| GO:0051329~interphase of mitotic cell cycle | 0,1782 | 0,03374 | CCNE1, CUL2, POLE, CDC123, PIM1, ITGB1, LATS2                                                                                                                                                                                                                                                                                                                                                                                                                                                                                                                                                                                                                                                                                                                                                                                                                                                                                                                                                                                                                                                                                    | 103  | 2,89830757  |
| GO:0006959~humoral immune response          | 0,1527 | 0,0375  | C4A, CFB, C4B, TFEB, TREM1, PDCD1                                                                                                                                                                                                                                                                                                                                                                                                                                                                                                                                                                                                                                                                                                                                                                                                                                                                                                                                                                                                                                                                                                | 79   | 3,238976634 |
| GO:0051325~interphase                       | 0,1782 | 0,03802 | CCNE1, CUL2, POLE, CDC123, PIM1, ITGB1, LATS2                                                                                                                                                                                                                                                                                                                                                                                                                                                                                                                                                                                                                                                                                                                                                                                                                                                                                                                                                                                                                                                                                    | 106  | 2,816279998 |

|                                                                 |        |         |                                                                                                 |     |             |
|-----------------------------------------------------------------|--------|---------|-------------------------------------------------------------------------------------------------|-----|-------------|
| GO:0015959~diadenosine polyphosphate metabolic process          | 0,0509 | 0,04621 | FHIT, NUDT3                                                                                     | 2   | 42,64652568 |
| GO:0015956~bis(5'-nucleosidyl) oligophosphate metabolic process | 0,0509 | 0,04621 | FHIT, NUDT3                                                                                     | 2   | 42,64652568 |
| GO:0042942~D-serine transport                                   | 0,0509 | 0,04621 | NFKBIE, SLC7A10                                                                                 | 2   | 42,64652568 |
| GO:0034982~mitochondrial protein processing                     | 0,0509 | 0,04621 | IMMP2L, MIPEP                                                                                   | 2   | 42,64652568 |
| GO:0015961~diadenosine polyphosphate catabolic process          | 0,0509 | 0,04621 | FHIT, NUDT3                                                                                     | 2   | 42,64652568 |
| GO:0006627~mitochondrial protein processing during import       | 0,0509 | 0,04621 | IMMP2L, MIPEP                                                                                   | 2   | 42,64652568 |
| GO:0015958~bis(5'-nucleosidyl) oligophosphate catabolic process | 0,0509 | 0,04621 | FHIT, NUDT3                                                                                     | 2   | 42,64652568 |
| GO:0051726~regulation of cell cycle                             | 0,3563 | 0,04775 | GTPBP4, GMNN, PIM1, ITGB1, LATS2, PRKCQ, MAD2L1BP, CCND3, CUL7, MDC1, MAPK14, CUL9, CDC123, LTB | 331 | 1,803780542 |
| GO:0046942~carboxylic acid transport                            | 0,2036 | 0,0573  | PPARD, AKR1C4, SLC26A8, NFKBIE, SLC7A1, SLC7A9, SLC7A10, AKR1C1                                 | 147 | 2,320899357 |
| GO:0015849~organic acid transport                               | 0,2036 | 0,059   | PPARD, AKR1C4, SLC26A8, NFKBIE, SLC7A1, SLC7A9, SLC7A10, AKR1C1                                 | 148 | 2,305217604 |



|                                                         |        |         |                                                                                                                                                                                        |     |             |
|---------------------------------------------------------|--------|---------|----------------------------------------------------------------------------------------------------------------------------------------------------------------------------------------|-----|-------------|
| GO:0051262~protein tetramerization                      | 0,1018 | 0,06238 | ALDH5A1, PFKP, ACOT13, PDSS1                                                                                                                                                           | 39  | 4,374002634 |
| GO:0008284~positive regulation of cell proliferation    | 0,4072 | 0,06368 | BMI1, PPARD, NRP1, CDX2, FLT1, IL2RA, FLT3, FGF9, ITGB1, PRKCQ, VEGFA, NOTCH4, CDC123, RUNX2, FKBPL, AGPAT1                                                                            | 414 | 1,648174905 |
| GO:0010464~regulation of mesenchymal cell proliferation | 0,0764 | 0,06518 | FGF9, VEGFA, ZEB1                                                                                                                                                                      | 18  | 7,10775428  |
| GO:0007049~cell cycle                                   | 0,6617 | 0,06582 | ZMYND11, KIFC1, PARD3, AIF1, GMNN, POLE, PIM1, UBR2, CDC5L, ITGB1, CENPJ, LATS2, PSMB8, SUV39H2, RNF8, CCNE1, CUL2, PSMD13, CCND3, SLC26A8, MDC1, MAP3K8, CDC123, SKA3, ZNF318, PARD6G | 776 | 1,428878438 |
| GO:0006468~protein amino acid phosphorylation           | 0,5854 | 0,06679 | MDFI, PAN3, FLT1, STK38, MYO3A, FLT3, LRRN3, PIM1, PTK7, CDK8, ABI1, MAPK10, LATS2, SRPK1, GRM4, PRKCQ, TTBK1, MAPK14, MAP3K8, MASTL, STK19, IP6K3, CAMK1D                             | 667 | 1,470569851 |

|                                                            |               |                |                                                                                                                                                                                                                                                                                                                                                                                                                                                                                                                                                                                                                                                                                                                                                                                                                                                                                                                                                                                                                            |             |                    |
|------------------------------------------------------------|---------------|----------------|----------------------------------------------------------------------------------------------------------------------------------------------------------------------------------------------------------------------------------------------------------------------------------------------------------------------------------------------------------------------------------------------------------------------------------------------------------------------------------------------------------------------------------------------------------------------------------------------------------------------------------------------------------------------------------------------------------------------------------------------------------------------------------------------------------------------------------------------------------------------------------------------------------------------------------------------------------------------------------------------------------------------------|-------------|--------------------|
| <p>GO:0044260~cellular macromolecule metabolic process</p> | <p>3,4614</p> | <p>0,07348</p> | <p>FHIT, CDX2, STK38, MIPEP, MCM10, MED20, EPC1, CUL2, CUL7, BRPF3, ZNF187, CUL9, GATA3, ZNF248, MAP3K8, LSM2, ZNF391, DNAJC1, PAN3, RPP21, POLH, MYO3A, ZNF507, POLE, MTPAP, PIM1, UBR2, TRERF1, SFRS3, DCLRE1C, ZNF192, ZNF193, RPS18, MRPS18A, FBXO18, VEGFA, ZNF438, BAT1, ZNF76, PPIL1, PTK7, TFEB, MRPS10, ASB13, RPL21P28, ZNF323, TTBK1, PTPLA, STK19, RUNX2, MDFI, KLF6, ZMYM2, TAF3, TAF8, SACS, YTHDC1, TEAD3, FOXP4, PSMB8, SUV39H2, NMT2, RNF8, RNF6, ZNF311, ST8SIA6, NOTCH4, TCF19, ZNF318, PARP4, HSP90AB1, BMI1, ABCF1, GTF3A, PPAR, USPL1, SEPHS1, ZEB1, ZKSCAN3, LATS2, IMMP2L, POU5F1, USP12, FANCE, MASTL, C19ORF40, IP6K3, ZNF33A, POLR1D, CDK8, CDC5L, HMGA1, SRPK1, GRM4, PRKCQ, CHST8, C19ORF2, ZSCAN16, AARS2, TTRAP, CAMK1D, SUPT3H, ZMYND11, ETV7, FKBP5, CREM, ZBTB9, ABI1, NFYA, KIN, MDC1, TRDMT1, DHX16, MTMR6, FKBPL, CEBPA, UPF2, FLT1, ADARB2, FLT3, CEBPG, LRRN3, TRIM27, ZNF25, PPP1R10, MAPK10, PRPF18, MSRB2, SIRT3, ZNF165, PSMD13, MAPK14, RPL21, PSPC1, USP49, SCAND3, RBM17</p> | <p>5214</p> | <p>1,112375814</p> |
| <p>GO:0006397~mRNA processing</p>                          | <p>0,3309</p> | <p>0,07454</p> | <p>ADARB2, PPIL1, MTPAP, DHX16, YTHDC1, CDC5L, LSM2, PRPF18, KIN, SRPK1, SFRS3, RBM17, BAT1</p>                                                                                                                                                                                                                                                                                                                                                                                                                                                                                                                                                                                                                                                                                                                                                                                                                                                                                                                            | <p>321</p>  | <p>1,727117862</p> |

|                                                    |        |         |                                                                                                                                                                                                                                                                                                                                                                                                                                                                                                                                                                                                                                                                                                                                                                                                                                                                                                                                                                                                                                                                                                                                                                                                                                                                                  |      |             |
|----------------------------------------------------|--------|---------|----------------------------------------------------------------------------------------------------------------------------------------------------------------------------------------------------------------------------------------------------------------------------------------------------------------------------------------------------------------------------------------------------------------------------------------------------------------------------------------------------------------------------------------------------------------------------------------------------------------------------------------------------------------------------------------------------------------------------------------------------------------------------------------------------------------------------------------------------------------------------------------------------------------------------------------------------------------------------------------------------------------------------------------------------------------------------------------------------------------------------------------------------------------------------------------------------------------------------------------------------------------------------------|------|-------------|
| GO:0044237~cellular metabolic process              | 4,3013 | 0,08389 | FHIT, CDX2, STK38, SLC7A9, MIPEP, MCM10, MED20, TAPBP, EPC1, CUL2, CUL7, BRPF3, ZNF187, CUL9, GATA3, ZNF248, MAP3K8, LSM2, DNAJC1, ZNF391, B3GALTL, PAN3, RPP21, POLH, MYO3A, NUDT3, ZNF507, POLE, NUDT5, MTPAP, PIM1, UBR2, TRERF1, SFRS3, DCLRE1C, ZNF192, ZNF193, RPS18, MRPS18A, FBXO18, VEGFA, ZNF438, BAT1, PFKFB3, ZNF76, OLAH, PPIL1, PTK7, MRPS10, TFEB, ASB13, ATP12A, PDSS1, RPL21P28, ZNF323, GAD2, TTBK1, PTPLA, GLO1, STK19, RUNX2, MDFI, KLF6, ZMYM2, TAF3, TAF8, SACS, YTHDC1, TEAD3, FOXP4, PSMB8, SUV39H2, NMT2, RNF8, RNF6, ZNF311, TPTE2, ST8SIA6, NOTCH4, FTSJD2, TCF19, ZNF318, PARP4, IDI1, PIP4K2A, HSP90AB1, ABCF1, BMI1, GTF3A, PPAR, USPL1, SEPHS1, GPLD1, ZEB1, N6AMT2, ZKSCAN3, LATS2, AKR1C3, AKR1C2, IMMP2L, CRYL1, AKR1C4, POU5F1, USP12, FANCE, MASTL, DHTKD1, C19ORF40, IP6K3, AKR1C1, AGPAT1, ZNF33A, PRTFDC1, PEPD, POLR1D, ALDH5A1, PFKP, CDK8, CDC5L, HMGA1, SRPK1, PRKCQ, GRM4, CHST8, C19ORF2, ZSCAN16, AARS2, PRHOXNB, CAMK1D, TTRAP, SUPT3H, ZMYND11, ETV7, FKBP5, CREM, ZBTB9, ABI1, NFYA, KIN, MDC1, TRDMT1, ALOX5AP, DHX16, MTMR6, FKBPL, CEBPA, UPF2, FLT1, ADARB2, FLT3, CEBPG, LRRN3, TRIM27, PPP1R10, ZNF25, MAPK10, PRPF18, MSRB2, ZNF165, SIRT3, PSMD13, SLC17A3, SLC17A4, MAPK14, RPL21, ATP8A2, PSPC1, USP49, SCAND3, RBM17 | 6636 | 1,086085419 |
| GO:0046130~purine ribonucleoside catabolic process | 0,0509 | 0,09029 | FHIT, NUDT3                                                                                                                                                                                                                                                                                                                                                                                                                                                                                                                                                                                                                                                                                                                                                                                                                                                                                                                                                                                                                                                                                                                                                                                                                                                                      | 4    | 21,32326284 |
| GO:0032329~serine transport                        | 0,0509 | 0,09029 | NFKBIE, SLC7A10                                                                                                                                                                                                                                                                                                                                                                                                                                                                                                                                                                                                                                                                                                                                                                                                                                                                                                                                                                                                                                                                                                                                                                                                                                                                  | 4    | 21,32326284 |
| GO:0006152~purine nucleoside catabolic process     | 0,0509 | 0,09029 | FHIT, NUDT3                                                                                                                                                                                                                                                                                                                                                                                                                                                                                                                                                                                                                                                                                                                                                                                                                                                                                                                                                                                                                                                                                                                                                                                                                                                                      | 4    | 21,32326284 |

|                                                                |        |         |                                                                                                                  |     |             |
|----------------------------------------------------------------|--------|---------|------------------------------------------------------------------------------------------------------------------|-----|-------------|
| GO:0006282~regulation of DNA repair                            | 0,0764 | 0,09265 | RNF8, POLH, CEBPG                                                                                                | 22  | 5,81543532  |
| GO:0006631~fatty acid metabolic process                        | 0,2291 | 0,09341 | AKR1C3, AKR1C2, CRYL1, PPAR, ALDH5A1, MAPK14, OLAH, CREM, ALOX5AP                                                | 198 | 1,93847844  |
| GO:0045893~positive regulation of transcription, DNA-dependent | 0,4327 | 0,09485 | CEBPA, KLF6, CDX2, TAF8, TFEB, TEAD3, NFYA, ZEB1, HMGA1, TRERF1, CCNE1, EPC1, RNF6, MAPK14, VEGFA, NOTCH4, RUNX2 | 477 | 1,519897142 |
| GO:0051216~cartilage development                               | 0,1273 | 0,09489 | FGF9, MAPK14, ZEB1, COL11A2, RUNX2                                                                               | 74  | 2,881522005 |

**group 4:** 1324 probes unvariated in HS cells/ amplified in LS cells

Chr 1 p36.32  
 Chr 5 p15.33 p15.32 p15.31 p15.2 p15.1  
 Chr 8 q11.1 q11.21 q11.22 q11.23 q12.1  
 Chr 11 q11  
 Chr 16 p11.2 p11.1  
 Chr 17 q21.33 q22

| Term                                     | %      | PValue  | Genes                                                                      | Pop Hits | Fold Enrichment |
|------------------------------------------|--------|---------|----------------------------------------------------------------------------|----------|-----------------|
| GO:0051716~cellular response to stimulus | 1,3854 | 0,00194 | RP1, ADCY2, LYN, RB1CC1, PAPD7, PRKDC, UBE2V2, STXBP4, TP73, PXDNL, TRIP13 | 820      | 3,15601626      |

|                                            |        |         |                                                                                                                                                                                                                                                                                                         |      |             |
|--------------------------------------------|--------|---------|---------------------------------------------------------------------------------------------------------------------------------------------------------------------------------------------------------------------------------------------------------------------------------------------------------|------|-------------|
| GO:0006302~double-strand break repair      | 0,5038 | 0,0022  | PAPD7, PRKDC, UBE2V2, TRIP13                                                                                                                                                                                                                                                                            | 62   | 15,17849462 |
| GO:0006259~DNA metabolic process           | 1,0076 | 0,00496 | DFFB, PAPD7, PRKDC, UBE2V2, MCM4, TERT, TP73, TRIP13                                                                                                                                                                                                                                                    | 506  | 3,719631094 |
| GO:0033554~cellular response to stress     | 1,0076 | 0,009   | LYN, RB1CC1, PAPD7, PRKDC, UBE2V2, TP73, PXDNL, TRIP13                                                                                                                                                                                                                                                  | 566  | 3,32532391  |
| GO:0044237~cellular metabolic process      | 4,7859 | 0,01091 | ADCY2, UTP18, SLC6A3, CTNND2, PRKDC, UBE2V2, UBE2QL1, PRDM16, LPCAT1, RB1CC1, MOS, SRD5A1, TCEA1, RPS20, TGS1, NSMAF, NSUN2, TERT, TRIP13, PLAG1, LYN, DFFB, PAPD7, ATP6V1H, LYPLA1, LRRC47, SNAI2, MARCH6, MCM4, TP73, PXDNL, MTRR, SPAG9, CCT5, TOM1L1, NME1, PCMTD1, ST18                            | 6636 | 1,347217199 |
| GO:0042493~response to drug                | 0,6297 | 0,01259 | LYN, NME1, SLC6A3, PAPD7, SRD5A1                                                                                                                                                                                                                                                                        | 216  | 5,445987654 |
| GO:0006974~response to DNA damage stimulus | 0,7557 | 0,01957 | LYN, PAPD7, PRKDC, UBE2V2, TP73, TRIP13                                                                                                                                                                                                                                                                 | 373  | 3,784450402 |
| GO:0008152~metabolic process               | 5,1637 | 0,02313 | ADCY2, UTP18, SLC6A3, ADAMTS16, CTNND2, PRKDC, UBE2V2, UBE2QL1, PRDM16, LPCAT1, RB1CC1, MOS, SDR16C5, SRD5A1, TCEA1, RPS20, TGS1, NSMAF, NSUN2, TERT, TRIP13, PLAG1, LYN, DFFB, PAPD7, ATP6V1H, LYPLA1, LRRC47, SNAI2, MARCH6, MCM4, TP73, PXDNL, MTRR, SPAG9, TMEM68, CCT5, TOM1L1, NME1, PCMTD1, ST18 | 7647 | 1,261400985 |

|                                                              |        |         |                                                                                                                                                                                                                                                                                 |      |             |
|--------------------------------------------------------------|--------|---------|---------------------------------------------------------------------------------------------------------------------------------------------------------------------------------------------------------------------------------------------------------------------------------|------|-------------|
| GO:0044238~primary metabolic process                         | 4,7859 | 0,02387 | ADCY2, UTP18, SLC6A3, ADAMTS16, CTNND2, PRKDC, UBE2V2, UBE2QL1, PRDM16, LPCAT1, RB1CC1, MOS, SRD5A1, TCEA1, RPS20, TGS1, NSMAF, NSUN2, TERT, TRIP13, PLAG1, LYN, DFFB, PAPD7, ATP6V1H, LYPLA1, LRRC47, SNAI2, MARCH6, MCM4, TP73, MTRR, SPAG9, CCT5, TOM1L1, NME1, PCMTD1, ST18 | 6923 | 1,291366941 |
| GO:0006281~DNA repair                                        | 0,6297 | 0,03077 | PAPD7, PRKDC, UBE2V2, TP73, TRIP13                                                                                                                                                                                                                                              | 284  | 4,142018779 |
| GO:0044249~cellular biosynthetic process                     | 2,7708 | 0,03535 | PLAG1, ADCY2, SLC6A3, CTNND2, PAPD7, ATP6V1H, LRRC47, SNAI2, PRDM16, MCM4, TP73, MTRR, LPCAT1, NME1, RB1CC1, SRD5A1, TCEA1, RPS20, ST18, TGS1, TERT, TRIP13                                                                                                                     | 3442 | 1,503738137 |
| GO:0034641~cellular nitrogen compound metabolic process      | 2,8967 | 0,03688 | PLAG1, ADCY2, UTP18, DFFB, SLC6A3, CTNND2, PAPD7, PRKDC, ATP6V1H, UBE2V2, SNAI2, PRDM16, MCM4, TP73, MTRR, NME1, RB1CC1, TCEA1, ST18, TGS1, NSUN2, TERT, TRIP13                                                                                                                 | 3670 | 1,474423252 |
| GO:0051171~regulation of nitrogen compound metabolic process | 2,3929 | 0,03804 | PLAG1, ADCY2, OPRK1, SLC6A3, IRX2, IRX1, CTNND2, PRKDC, UBE2V2, PRDM16, SNAI2, MCM4, TP73, MBTD1, NME1, RB1CC1, TCEA1, ST18, TGS1                                                                                                                                               | 2839 | 1,574521545 |
| GO:0001510~RNA methylation                                   | 0,2519 | 0,04103 | TGS1, NSUN2                                                                                                                                                                                                                                                                     | 10   | 47,05333333 |
| GO:0080090~regulation of primary metabolic process           | 2,6448 | 0,04217 | PLAG1, ADCY2, LYN, OPRK1, SLC6A3, IRX2, IRX1, CTNND2, PRKDC, UBE2V2, UBE2QL1, PRDM16, SNAI2, MCM4, TP73, MBTD1, NME1, RB1CC1, TCEA1, ST18, TGS1                                                                                                                                 | 3291 | 1,501245822 |
| GO:0044271~nitrogen compound biosynthetic process            | 0,6297 | 0,04672 | ADCY2, NME1, SLC6A3, ATP6V1H, MTRR                                                                                                                                                                                                                                              | 325  | 3,619487179 |

|                                                                                                |        |         |                                                                                                                                                                                                          |      |             |
|------------------------------------------------------------------------------------------------|--------|---------|----------------------------------------------------------------------------------------------------------------------------------------------------------------------------------------------------------|------|-------------|
| GO:0009058~biosynthetic process                                                                | 2,7708 | 0,04693 | PLAG1, ADCY2, SLC6A3, CTNND2, PAPD7, ATP6V1H, LRRC47, SNAI2, PRDM16, MCM4, TP73, MTRR, LPCAT1, NME1, RB1CC1, SRD5A1, TCEA1, RPS20, ST18, TGS1, TERT, TRIP13                                              | 3542 | 1,461283644 |
| GO:0006807~nitrogen compound metabolic process                                                 | 2,8967 | 0,04957 | PLAG1, ADCY2, UTP18, DFFB, SLC6A3, CTNND2, PAPD7, PRKDC, ATP6V1H, UBE2V2, SNAI2, PRDM16, MCM4, TP73, MTRR, NME1, RB1CC1, TCEA1, ST18, TGS1, NSUN2, TERT, TRIP13                                          | 3778 | 1,432274572 |
| GO:0019222~regulation of metabolic process                                                     | 2,7708 | 0,05793 | PLAG1, ADCY2, LYN, OPRK1, SLC6A3, IRX2, IRX1, CTNND2, PRKDC, UBE2V2, UBE2QL1, PRDM16, SNAI2, MCM4, TP73, SPAG9, MBTD1, NME1, RB1CC1, TCEA1, ST18, TGS1                                                   | 3621 | 1,429402559 |
| GO:0006139~nucleobase, nucleoside, nucleotide and nucleic acid metabolic process               | 2,6448 | 0,05844 | PLAG1, ADCY2, UTP18, DFFB, CTNND2, PAPD7, PRKDC, ATP6V1H, UBE2V2, SNAI2, PRDM16, MCM4, TP73, NME1, RB1CC1, TCEA1, ST18, TGS1, NSUN2, TERT, TRIP13                                                        | 3409 | 1,449281314 |
| GO:0044260~cellular macromolecule metabolic process                                            | 3,6524 | 0,06297 | UTP18, CTNND2, PRKDC, UBE2V2, UBE2QL1, PRDM16, RB1CC1, MOS, TCEA1, RPS20, TGS1, NSUN2, TERT, TRIP13, PLAG1, LYN, DFFB, PAPD7, LRRC47, MARCH6, SNAI2, MCM4, TP73, SPAG9, CCT5, TOM1L1, NME1, PCMTD1, ST18 | 5214 | 1,308541107 |
| GO:0019219~regulation of nucleobase, nucleoside, nucleotide and nucleic acid metabolic process | 2,267  | 0,06535 | PLAG1, ADCY2, IRX2, OPRK1, IRX1, CTNND2, PRKDC, UBE2V2, PRDM16, SNAI2, MCM4, TP73, MBTD1, NME1, RB1CC1, TCEA1, ST18, TGS1                                                                                | 2814 | 1,504904051 |
| GO:0032868~response to insulin stimulus                                                        | 0,3778 | 0,06552 | LYN, PRKDC, STXBP4                                                                                                                                                                                       | 100  | 7,058       |

|                                                                     |        |         |                                                                                                                                               |      |             |
|---------------------------------------------------------------------|--------|---------|-----------------------------------------------------------------------------------------------------------------------------------------------|------|-------------|
| GO:0031323~regulation of cellular metabolic process                 | 2,6448 | 0,06742 | PLAG1, ADCY2, LYN, OPRK1, SLC6A3, IRX2, IRX1, CTNND2, PRKDC, UBE2V2, PRDM16, SNAI2, MCM4, TP73, SPAG9, MBTD1, NME1, RB1CC1, TCEA1, ST18, TGS1 | 3464 | 1,426270208 |
| GO:0002762~negative regulation of myeloid leukocyte differentiation | 0,2519 | 0,06876 | NME1, PRDM16                                                                                                                                  | 17   | 27,67843137 |
| GO:0080135~regulation of cellular response to stress                | 0,3778 | 0,06899 | LYN, UBE2V2, TP73                                                                                                                             | 103  | 6,852427184 |
| GO:0042221~response to chemical stimulus                            | 1,2594 | 0,08323 | ADCY2, LYN, NME1, SLC6A3, PAPD7, PRKDC, SRD5A1, STXBP4, SLC6A19, PXDNL                                                                        | 1281 | 1,836586001 |
| GO:0015837~amine transport                                          | 0,3778 | 0,08718 | LYN, SLC6A3, SLC6A19                                                                                                                          | 118  | 5,981355932 |
| GO:0022414~reproductive process                                     | 0,8816 | 0,09751 | SPAG9, NME1, SLC6A3, OPRK1, PRKDC, SRD5A1, TRIP13                                                                                             | 762  | 2,161242345 |
| GO:0030261~chromosome condensation                                  | 0,2519 | 0,0995  | DFFB, PAPD7                                                                                                                                   | 25   | 18,82133333 |
| GO:0000003~reproduction                                             | 0,8816 | 0,09984 | SPAG9, NME1, SLC6A3, OPRK1, PRKDC, SRD5A1, TRIP13                                                                                             | 767  | 2,147153412 |
